# Supplementary material
Source: Springer Nature journal article supplement (https://www.springermedizin.de/resource/supplementary/12958_2010_867_MOESM9_ESM.pdf/9569054)

**ADAM1**

**ADAM2**

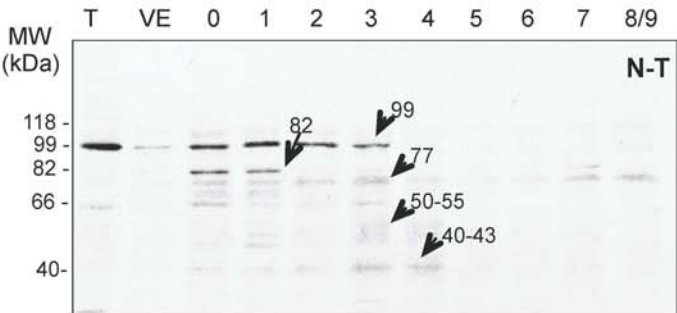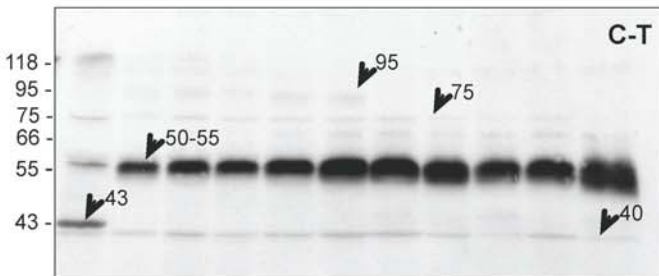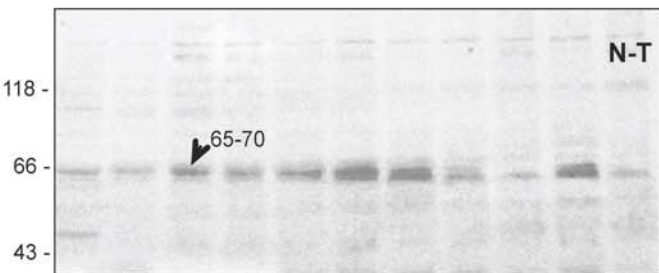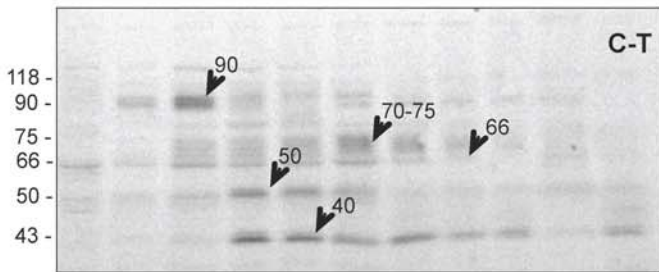

T VE 0 1 2 3 4 5 6 7 8/9

Samples regions

Supplement: MOESM9 [file 9569054]
